# Supplementary material for: Association Between Discrimination Stress and Suicidality in Preadolescent Children
Source: Atypon-hosted journal article supplement (doi:10.1176/appi.focus.22020005), 2022-04-01
Supplement: appi.focus.22020005.ds001.pdf [file appi.focus.22020005.ds001.pdf]

## Supplement 1

### Supplemental methods

To address confounding effects of other environmental adversities we included the following environmental exposures: experiences of poverty in the household (count); family conflict scale; negative life events (count of experiences); and neighborhood socioeconomic status based on estimates of area deprivation using an index accounting for scaled weighted sum of census-tract variables.<sup>1</sup> Items addressing experiences of household poverty were part of the PhenX Toolkit<sup>2</sup> in the ABCD longitudinal demographics survey. Due to high collinearity, we collapsed these items to form a lumped sum-level variable for our analyses (See **Figure S2** for a scree plot of the 7 items). For information about validity, please see Diemer et al.<sup>3</sup> Family conflict was assessed via the family conflict subscale of the Family Environment Scale; please see Moos & Moos.<sup>4</sup> Negative life events were assessed using the Adverse Life Events Scale from the PhenX Toolkit; please see Tiet et al.<sup>5</sup> Neighborhood socioeconomic status was measured using the Area Deprivation Index (ADI); please see Singh.<sup>6</sup>

To address confounding effects of multiple psychopathology domains<sup>7</sup> associated with suicidality, we used KSADS-5-based diagnoses of any externalizing disorder (attention deficit hyperactivity disorder [ADHD], oppositional defiant disorder [ODD], or conduct disorder), or depression or anxiety.<sup>8</sup> Given that prior research indicates greater validity of parental report for externalizing disorders and youth reports of internalizing disorders, we utilized parental and youths report of externalizing and internalizing disorders respectively.<sup>9,10</sup> Psychosis spectrum was included using the severity score of the prodromal psychosis scale (Prodromal Questionnaire Brief Version [PQ-B]) applied in the ABCD Study®.<sup>11</sup> For information about validity, please see

Karcher et al.<sup>12</sup> For more information on the selection of measures in the ABCD Study® see Barch et al.<sup>13</sup>

## References

1. Kind AJH, Jencks S, Brock J, et al. Neighborhood socioeconomic disadvantage and 30-day rehospitalization: A retrospective cohort study. *Ann Intern Med.* 2014;161(11):765-774. doi:10.7326/M13-2946
2. Stover PJ, Harlan WR, Hammond JA, Hendershot T, Hamilton CM. PhenX: A toolkit for interdisciplinary genetics research. *Curr Opin Lipidol.* 2010;21(2):136-140. doi:10.1097/MOL.0b013e3283377395
3. Diemer MA, Mistry RS, Wadsworth ME, López I, Reimers F. Best practices in conceptualizing and measuring social class in psychological research. *Anal Soc Issues Public Policy.* 2013;13(1):77-113. doi:10.1111/asap.12001
4. Moos BS, Moos RH. *Family Environment Scale Manual and Sampler Set: Development, Applications and Research.* 4th ed. Mind Garden; 2009.
5. Tiet QQ, Bird HR, Hoven CW, et al. Relationship between specific adverse life events and psychiatric disorders. *J Abnorm Child Psychol.* 2001;29(2):153-164. doi:10.1023/A:1005288130494
6. Singh GK. Area deprivation and widening inequalities in US mortality, 1969-1998. *Am J Public Health.* 2003;93(7):1137-1143. doi:10.2105/AJPH.93.7.1137
7. Xia CH, Ma Z, Ciric R, et al. Linked dimensions of psychopathology and connectivity in functional brain networks. *Nat Commun.* 2018;9(1):1-14. doi:10.1038/s41467-018-05317-y
8. Townsend L, Kobak K, Kearney C, et al. Development of three web-based computerized

- versions of the Kiddie Schedule for Affective Disorders and Schizophrenia child psychiatric diagnostic interview: Preliminary validity data. *J Am Acad Child Adolesc Psychiatry*. 2020;59(2):309-325. doi:10.1016/j.jaac.2019.05.009
9. Hope TL, Adams C, Reynolds L, Powers D, Perez RA, Kelley M Lou. Parent vs. self-report: Contributions toward diagnosis of adolescent psychopathology. *J Psychopathol Behav Assess*. 1999;21(4):349-363. doi:10.1023/A:1022124900328
  10. Du Rietz E, Cheung CHM, McLoughlin G, et al. Self-report of ADHD shows limited agreement with objective markers of persistence and remittance. *J Psychiatr Res*. 2016;82:91-99. doi:10.1016/j.jpsychires.2016.07.020
  11. Loewy RL, Pearson R, Vinogradov S, Bearden CE, Cannon TD. Psychosis risk screening with the Prodromal Questionnaire - Brief Version (PQ-B). *Schizophr Res*. 2011;129(1):42-46. doi:10.1016/j.schres.2011.03.029
  12. Karcher NR, Barch DM, Avenevoli S, et al. Assessment of the Prodromal Questionnaire—Brief Child Version for measurement of self-reported psychoticlike experiences in childhood. *JAMA Psychiatry*. 2018;75(8):853-861. doi:10.15154/1412097.
  13. Barch DM, Albaugh MD, Avenevoli S, et al. Demographic, physical and mental health assessments in the adolescent brain and cognitive development study: Rationale and description. *Dev Cogn Neurosci*. 2018;32(October 2017):55-66. doi:10.1016/j.dcn.2017.10.010

**Table S1.** ABCD Study® variables used in the study analyses

|                     | <b>ABCD variable ID</b> | <b>Variable description</b>                                                                                             | <b>Notes</b>                                                                                                                                                                          |  |
|---------------------|-------------------------|-------------------------------------------------------------------------------------------------------------------------|---------------------------------------------------------------------------------------------------------------------------------------------------------------------------------------|--|
|                     | interview_age           | Age in months at the time of the interview/test/sampling/imaging.                                                       | Converted from months in ABCD archive to years for our study                                                                                                                          |  |
|                     | sex                     | Sex of the subject                                                                                                      | Only male and female taken                                                                                                                                                            |  |
|                     | demo_prnt_ed_v2_l       | What is the highest grade or level of school you have completed or the highest degree you have received?                | Combined years determined parental education for our study                                                                                                                            |  |
|                     | demo_prnt_ed_v2_l       | What is the highest grade or level of school your partner completed or highest degree they received?                    |                                                                                                                                                                                       |  |
| <b>Demographics</b> | demo_race_a_p__10       | What race do you consider the child to be? (White)                                                                      |                                                                                                                                                                                       |  |
|                     | demo_race_a_p__11       | What race do you consider the child to be? (Black/African American)                                                     |                                                                                                                                                                                       |  |
|                     | demo_race_a_p__18       | What race do you consider the child to be? (Asian Indian)                                                               |                                                                                                                                                                                       |  |
|                     | demo_race_a_p__19       | What race do you consider the child to be? (Chinese)                                                                    |                                                                                                                                                                                       |  |
|                     | demo_race_a_p__20       | What race do you consider the child to be? (Filipino)                                                                   |                                                                                                                                                                                       |  |
|                     | demo_race_a_p__21       | What race do you consider the child to be? (Japanese)                                                                   | All combined under Asian                                                                                                                                                              |  |
|                     | demo_race_a_p__22       | What race do you consider the child to be? (Korean)                                                                     |                                                                                                                                                                                       |  |
|                     | demo_race_a_p__23       | What race do you consider the child to be? (Vietnamese)                                                                 |                                                                                                                                                                                       |  |
|                     | demo_race_a_p__24       | What race do you consider the child to be? (Other, Asian)                                                               |                                                                                                                                                                                       |  |
|                     | demo_race_a_p__12       | What race do you consider the child to be? (American Indian)                                                            |                                                                                                                                                                                       |  |
|                     | demo_race_a_p__14       | What race do you consider the child to be? (Native Hawaiian)                                                            |                                                                                                                                                                                       |  |
|                     | demo_ethn_v2            | Do you consider the child Hispanic/Latino/Latina?                                                                       |                                                                                                                                                                                       |  |
|                     | <b>Discrimination</b>   | dim_yesno_q1                                                                                                            | In the past 12 months, have you felt discriminated against: because of your race, ethnicity, or color? Definition of ethnicity: groups of people who have the same customs, or origin |  |
|                     |                         | dim_yesno_q2                                                                                                            | In the past 12 months, have you felt discriminated against: because you are (or your family is) from another country?                                                                 |  |
| dim_yesno_q3        |                         | In the past 12 months, have you felt discriminated against: because someone thought you were gay, lesbian, or bisexual? |                                                                                                                                                                                       |  |

|                 |                    |                                                                                                                                     |                                                                                                                                                                                                                                                           |                                                                                                                         |
|-----------------|--------------------|-------------------------------------------------------------------------------------------------------------------------------------|-----------------------------------------------------------------------------------------------------------------------------------------------------------------------------------------------------------------------------------------------------------|-------------------------------------------------------------------------------------------------------------------------|
|                 | dim_yesno_q4       | In the past 12 months, have you felt discriminated against because of your weight?                                                  |                                                                                                                                                                                                                                                           |                                                                                                                         |
|                 | dim_matrix_q1      | How often do the following people treat you unfairly or negatively because of your ethnic background? (Teachers)                    |                                                                                                                                                                                                                                                           |                                                                                                                         |
|                 | dim_matrix_q2      | How often do the following people treat you unfairly or negatively because of your ethnic background? (Other adults outside school) |                                                                                                                                                                                                                                                           |                                                                                                                         |
|                 | dim_matrix_q3      | How often do the following people treat you unfairly or negatively because of your ethnic background? (Other students)              | 7-question scores combined and stratified into deciles to determine High (at or above 90th percentile) or Low (under 90th percentile) discrimination for our main analyses                                                                                |                                                                                                                         |
|                 | dim_matrix_q4      | I feel that others behave in an unfair or negative way toward my ethnic group                                                       |                                                                                                                                                                                                                                                           |                                                                                                                         |
|                 | dim_matrix_q5      | I feel that I am not wanted in American society                                                                                     |                                                                                                                                                                                                                                                           |                                                                                                                         |
|                 | dim_matrix_q6      | I don't feel accepted by other Americans                                                                                            |                                                                                                                                                                                                                                                           |                                                                                                                         |
|                 | dim_matrix_q7      | I feel that other Americans have something against me                                                                               |                                                                                                                                                                                                                                                           |                                                                                                                         |
|                 | demo_origin_v2     | In which country was the child born?                                                                                                |                                                                                                                                                                                                                                                           | Any answer other than USA (United States of America - including territories such as Puerto Rico) considered non-US born |
|                 | kbi_y_sex_orient   | Are you gay or bisexual?                                                                                                            |                                                                                                                                                                                                                                                           | If yes was answered to either question, the participant was considered LGBT                                             |
|                 | kbi_y_trans_id     | Are you transgender?                                                                                                                |                                                                                                                                                                                                                                                           |                                                                                                                         |
|                 | anthroweightcalc   | Average Measured Weight (lbs)                                                                                                       | BMI calculated using following equation: $\text{anthroweightcalc} / (\text{anthroheightcalc})^2 * 703$ ; any participant with a BMI over 95 <sup>th</sup> percentile was considered obese and under 5 <sup>th</sup> percentile was considered underweight |                                                                                                                         |
|                 | anthroheightcalc   | Standing Height Average (inches)                                                                                                    |                                                                                                                                                                                                                                                           |                                                                                                                         |
| <b>Exposome</b> | demo_fam_exp1_v2_l | Needed food but couldn't afford to buy it or couldn't afford to go out to get it?                                                   | Answers to these 7 questions were combined to determine our measure of family poverty                                                                                                                                                                     |                                                                                                                         |
|                 | demo_fam_exp2_v2_l | Were without telephone service because you could not afford it?                                                                     |                                                                                                                                                                                                                                                           |                                                                                                                         |

|                        |                                                                                                                                                                          |                                                                                        |                                                                                                                 |
|------------------------|--------------------------------------------------------------------------------------------------------------------------------------------------------------------------|----------------------------------------------------------------------------------------|-----------------------------------------------------------------------------------------------------------------|
| demo_fam_exp3_v2_l     | Didn't pay the full amount of the rent or mortgage because you could not afford it? ?No pagaron el monto total de la renta o hipoteca porque no les alcanzaba el dinero? |                                                                                        |                                                                                                                 |
| demo_fam_exp4_v2_l     | Were evicted from your home for not paying the rent or mortgage?                                                                                                         |                                                                                        |                                                                                                                 |
| demo_fam_exp5_v2_l     | Had services turned off by the gas or electric company, or the oil company wouldn't deliver oil because payments were not made?                                          |                                                                                        |                                                                                                                 |
| demo_fam_exp6_v2_l     | Had someone who needed to see a doctor or go to the hospital but didn't go because you could not afford it?                                                              |                                                                                        |                                                                                                                 |
| demo_fam_exp7_v2_l     | Had someone who needed a dentist but couldn't go because you could not afford it?                                                                                        |                                                                                        |                                                                                                                 |
| fes_youth_q1           | We fight a lot in our family.                                                                                                                                            |                                                                                        |                                                                                                                 |
| fes_youth_q2           | Family members rarely become openly angry.                                                                                                                               |                                                                                        |                                                                                                                 |
| fes_youth_q3           | Family members sometimes get so angry they throw things.                                                                                                                 |                                                                                        |                                                                                                                 |
| fes_youth_q4           | Family members hardly ever lose their tempers.                                                                                                                           |                                                                                        |                                                                                                                 |
| fes_youth_q5           | Family members often criticize each other.                                                                                                                               | Answers to these 9 questions were combined to determine our measure of family conflict |                                                                                                                 |
| fes_youth_q6           | Family members sometimes hit each other.                                                                                                                                 |                                                                                        |                                                                                                                 |
| fes_youth_q7           | If there's a disagreement in our family, we try hard to smooth things over and keep the peace.                                                                           |                                                                                        |                                                                                                                 |
| fes_youth_q8           | Family members often try to one-up or outdo each other.                                                                                                                  |                                                                                        |                                                                                                                 |
| fes_youth_q9           | In our family, we believe you don't ever get anywhere by raising your voice.                                                                                             |                                                                                        |                                                                                                                 |
| reshist_addr1_adi_wsum | Residential history derived - Area Deprivation Index: scaled weighted sum based on Kind et al., Annals of Internal Medicine, 2014 1                                      |                                                                                        | Area deprivation index matched with census residential history was used to determine neighborhood poverty level |
| ple_y_ss_total_bad     | Life events: Total Number of Bad Events: Validation: No Minimum                                                                                                          |                                                                                        |                                                                                                                 |
| <b>Psychopathology</b> | ksads_14_856_p                                                                                                                                                           |                                                                                        | Diagnosis - Unspecified Attention-Deficit/Hyperactivity Disorder (F90.9)                                        |
|                        |                                                                                                                                                                          |                                                                                        | Any of these diagnoses were used to determine the presence                                                      |

|                |                                                                                                                          |                                                                          |
|----------------|--------------------------------------------------------------------------------------------------------------------------|--------------------------------------------------------------------------|
| ksads_14_855_p | Diagnosis - Attention-Deficit/Hyperactivity Disorder IN PARTIAL REMISSION                                                | of an externalizing psychopathology                                      |
| ksads_14_853_p | Diagnosis - Attention-Deficit/Hyperactivity Disorder Present                                                             |                                                                          |
| ksads_14_854_p | Diagnosis - Attention-Deficit/Hyperactivity Disorder Past                                                                |                                                                          |
| ksads_15_901_p | Diagnosis - Oppositional Defiant Disorder Present F91.3                                                                  |                                                                          |
| ksads_15_902_p | Diagnosis - Oppositional Defiant Disorder Past F91.3                                                                     |                                                                          |
| ksads_16_900_p | Diagnosis - Conduct Disorder past adolescent onset (F91.2)                                                               |                                                                          |
| ksads_16_897_p | Diagnosis - Conduct Disorder present childhood onset (F91.1)                                                             |                                                                          |
| ksads_16_899_p | Diagnosis - Conduct Disorder past childhood onset (F91.1)                                                                |                                                                          |
| ksads_16_898_p | Diagnosis - Conduct Disorder present adolescent onset (F91.2)                                                            |                                                                          |
| ksads_1_840_t  | Diagnosis - Major Depressive Disorder Present                                                                            |                                                                          |
| ksads_1_841_t  | Diagnosis - Major Depressive Disorder, Current, in Partial Remission (F32.4)                                             |                                                                          |
| ksads_1_842_t  | Diagnosis - Major Depressive Disorder, Past (F32.9)                                                                      |                                                                          |
| ksads_1_843_t  | Diagnosis - Persistent Depressive Disorder (Dysthymia) PRESENT F34.1                                                     | Any of these diagnoses were used to determine the presence of depression |
| ksads_1_844_t  | Diagnosis - Persistent Depressive Disorder (Dysthymia) In Partial Remission F34.1                                        |                                                                          |
| ksads_1_845_t  | Diagnosis - Persistent Depressive Disorder (Dysthymia) PAST F34.1                                                        |                                                                          |
| ksads_1_846_t  | Diagnosis - Unspecified Depressive Disorder Current (F32.9)                                                              |                                                                          |
| ksads_1_847_t  | Diagnosis - Unspecified Depressive Disorder PAST (F32.9)                                                                 |                                                                          |
| ksads_8_863_t  | Diagnosis - Social Anxiety Disorder (F40.10) PRESENT                                                                     |                                                                          |
| ksads_8_864_t  | Diagnosis - Social Anxiety Disorder (F40.10) PAST                                                                        |                                                                          |
| ksads_10_869_t | Diagnosis - Generalized Anxiety Disorder Present (F41.1)                                                                 | Any of these diagnoses were used to determine the presence of anxiety    |
| ksads_10_870_t | Diagnosis - Generalized Anxiety Disorder Past (F41.1)                                                                    |                                                                          |
| ksads_8_911_t  | Diagnosis - Other Specified Anxiety Disorder (Social Anxiety Disorder, impairment, does not meet minimum duration) F41.8 |                                                                          |

|                |                                                                                                                                                                                                                                                             |
|----------------|-------------------------------------------------------------------------------------------------------------------------------------------------------------------------------------------------------------------------------------------------------------|
| ksads_8_912_t  | Diagnosis - Other Specified Anxiety Disorder (Social Anxiety Disorder, impairment, does not meet minimum duration), PAST, F41.8                                                                                                                             |
| ksads_10_913_t | Diagnosis - Other Specified Anxiety Disorder (Generalized Anxiety Disorder, impairment, does not meet minimum duration) F41.8                                                                                                                               |
| ksads_10_914_t | Diagnosis - Other Specified Anxiety Disorder (Generalized Anxiety Disorder, impairment, does not meet minimum duration), PAST, F41.8                                                                                                                        |
| prodromal_1_y  | Did places that you know well, such as your bedroom, or other rooms in your home, your classroom or school yard, suddenly seem weird, strange or confusing to you; like not the real world?                                                                 |
| prodromal_2_y  | Did you hear strange sounds that you never noticed before like banging, clicking, hissing, clapping, or ringing in your ears?                                                                                                                               |
| prodromal_3_y  | Do things that you see appear different from the way they usually do (brighter or duller, larger or smaller, or changed in some other way)?                                                                                                                 |
| prodromal_4_y  | Did you feel like you had special, unusual powers like you could make things happen by magic, or that you could magically know what was inside another person's mind, or magically know what was going to happen in the future when other people could not? |
| prodromal_5_y  | Did you feel that someone else, who is not you, has taken control over the private, personal, thoughts or ideas inside your head?                                                                                                                           |
| prodromal_6_y  | Did you suddenly find it hard to figure out how to say something quickly and easily so that other people would understand what you meant?                                                                                                                   |
| prodromal_7_y  | Did you ever feel very certain that you have very special abilities or magical talents that other people do not have?                                                                                                                                       |

These 21 questions make up the prodromal psychosis scale



|                |                                                                                                                                                                                                                                 |
|----------------|---------------------------------------------------------------------------------------------------------------------------------------------------------------------------------------------------------------------------------|
| prodromal_8_y  | Did you suddenly feel that you could not trust other people because they seemed to be watching you or talking about you in an unfriendly way?                                                                                   |
| prodromal_9_y  | Do you sometimes get strange feelings on or just beneath your skin, like bugs crawling?                                                                                                                                         |
| prodromal_10_y | Did you lose concentration because you noticed sounds in the distance that you usually don't hear?                                                                                                                              |
| prodromal_11_y | Although you could not see anything or anyone, did you suddenly start to feel that an invisible energy, creature, or some person was around you?                                                                                |
| prodromal_12_y | Did you start to worry at times that your mind was trying to trick you or was not working right?                                                                                                                                |
| prodromal_13_y | Did you feel that the world is not real, you are not real, or that you are dead?                                                                                                                                                |
| prodromal_14_y | Did you feel confused because something you experienced didn't seem real or it seemed imaginary to you?                                                                                                                         |
| prodromal_15_y | Did you honestly believe in things that other people would say are unusual or weird?                                                                                                                                            |
| prodromal_16_y | Did you feel that parts of your body had suddenly changed or worked differently than before; like your legs had suddenly turned to something else or your nose could suddenly smell things you'd never actually smelled before? |
| prodromal_17_y | Did you feel that sometimes your thoughts were so strong you could almost hear them, as if another person, NOT you, spoke them?                                                                                                 |
| prodromal_18_y | Did you feel that other people might want something bad to happen to you or that you could not trust other people?                                                                                                              |
| prodromal_19_y | Did you suddenly start to see unusual things that you never saw before like flashes, flames, blinding light, or shapes floating in front of you?                                                                                |
| prodromal_20_y | Have you seen things that other people can't see or don't seem to see?                                                                                                                                                          |

---

|                |                                                                                                                                                          |                                                                   |
|----------------|----------------------------------------------------------------------------------------------------------------------------------------------------------|-------------------------------------------------------------------|
| prodromal_21_y | Did you suddenly start to notice that people sometimes had a hard time understanding what you were saying, even though they used to understand you well? |                                                                   |
| ksads_23_946_t | Diagnosis - Suicidal ideation (Passive) (Present)                                                                                                        |                                                                   |
| ksads_23_947_t | Diagnosis - Suicidal ideation (Active, nonspecific) (Present)                                                                                            |                                                                   |
| ksads_23_948_t | Diagnosis - Suicidal ideation (Active, method) (Present)                                                                                                 |                                                                   |
| ksads_23_949_t | Diagnosis - Suicidal ideation (Active, intent) (Present)                                                                                                 |                                                                   |
| ksads_23_950_t | Diagnosis - Suicidal ideation (Active, plan) (Present)                                                                                                   |                                                                   |
| ksads_23_951_t | Diagnosis - Preparatory Actions toward imminent Suicidal behavior (Present)                                                                              |                                                                   |
| ksads_23_952_t | Diagnosis - Interrupted Attempt (Present)                                                                                                                |                                                                   |
| ksads_23_953_t | Diagnosis - Aborted Attempt (Present)                                                                                                                    |                                                                   |
| ksads_23_954_t | Diagnosis - Suicide Attempt (Present)                                                                                                                    | Presence of any of these symptoms determined lifetime suicidality |
| ksads_23_957_t | Diagnosis - Suicidal ideation (Passive) (Past)                                                                                                           |                                                                   |
| ksads_23_958_t | Diagnosis - Suicidal ideation (Active, nonspecific) (Past)                                                                                               |                                                                   |
| ksads_23_959_t | Diagnosis - Suicidal ideation (Active, method) (Past)                                                                                                    |                                                                   |
| ksads_23_960_t | Diagnosis - Suicidal ideation (Active, intent) (Past)                                                                                                    |                                                                   |
| ksads_23_961_t | Diagnosis - Suicidal ideation (Active, plan) (Past)                                                                                                      |                                                                   |
| ksads_23_962_t | Diagnosis - Preparatory Actions toward imminent Suicidal behavior (Past)                                                                                 |                                                                   |
| ksads_23_963_t | Diagnosis - Interrupted Attempt (Past)                                                                                                                   |                                                                   |
| ksads_23_964_t | Diagnosis - Aborted Attempt (Past)                                                                                                                       |                                                                   |
| ksads_23_965_t | Diagnosis - Suicide Attempt (Past)                                                                                                                       |                                                                   |

Note: ABCD variables are listed and stratified into our analysis categories: demographics, discrimination, exposome, and psychopathology. Notes explaining how they were used in our study are added when necessary.

Abbreviations: ABCD = adolescent brain and cognitive development study; LGBT = lesbian, gay, bisexual, transgender.

<sup>a</sup>These items were only collected at baseline.

**Table S2.** Discrimination-specific tool in the ABCD Study®

| <b>Question</b>                                                                                                                                                                          | <b>Element name in ABCD</b> | <b>Possible responses</b> | <b>Positive endorsement (n [%])<sup>a</sup></b> |
|------------------------------------------------------------------------------------------------------------------------------------------------------------------------------------------|-----------------------------|---------------------------|-------------------------------------------------|
| In the past 12 months, have you felt discriminated against: because of your race, ethnicity, or color?<br>Definition of ethnicity: groups of people who have the same customs, or origin | dim_yesno_q1                | binary yes/no             | 472 (4.2%)                                      |
| In the past 12 months, have you felt discriminated against: because you are (or your family is) from another country?                                                                    | dim_yesno_q2                | binary yes/no             | 177 (1.6%)                                      |
| In the past 12 months, have you felt discriminated against: because someone thought you were gay, lesbian, or bisexual?                                                                  | dim_yesno_q3                | binary yes/no             | 408 (3.6%)                                      |
| In the past 12 months, have you felt discriminated against: because of your weight?                                                                                                      | dim_yesno_q4                | binary yes/no             | 654 (5.8%)                                      |
| How often do the following people treat you unfairly or negatively because of your ethnic background?<br>Teachers:                                                                       | dim_matrix_q1               | 1-5 Likert scale          | 798 (7.1%)                                      |
| How often do the following people treat you unfairly or negatively because of your ethnic background?<br>Other adults outside school:                                                    | dim_matrix_q2               | 1-5 Likert scale          | 1,010 (9%)                                      |
| How often do the following people treat you unfairly or negatively because of your ethnic background?<br>Other students:                                                                 | dim_matrix_q3               | 1-5 Likert scale          | 2,594 (23.1%)                                   |
| I feel that others behave in an unfair or negative way toward my ethnic group:                                                                                                           | dim_matrix_q4               | 1-5 Likert scale          | 1,775 (15.8%)                                   |
| I feel that I am not wanted in American society:                                                                                                                                         | dim_matrix_q5               | 1-5 Likert scale          | 483 (4.3%)                                      |
| I don't feel accepted by other Americans:                                                                                                                                                | dim_matrix_q6               | 1-5 Likert scale          | 649 (5.8%)                                      |
| I feel that other Americans have something against me:                                                                                                                                   | dim_matrix_q7               | 1-5 Likert scale          | 879 (7.8%)                                      |

Note: The 11 discrimination questions – 4 binary yes/no and 7 Likert scale items – are described along with their response frequency.

Abbreviations: ABCD = adolescent brain and cognitive development study.

<sup>a</sup> In the items scored on a Likert scale, we considered endorsement for any response above 1.

**Table S3.** Univariate comparisons of past 12-months discrimination experiences and suicide rates across races and ethnicity.

|                                                       | <b>Non-Black</b> | <b>Black</b> | <b><math>\chi^2</math></b> | <b><i>p</i>-value<sup>a</sup></b> | <b>Non-Hispanic</b> | <b>Hispanic</b> | <b><math>\chi^2</math></b> | <b><i>p</i>-value<sup>a</sup></b> |
|-------------------------------------------------------|------------------|--------------|----------------------------|-----------------------------------|---------------------|-----------------|----------------------------|-----------------------------------|
| <b>Discrimination experiences, n (%)</b>              |                  |              |                            |                                   |                     |                 |                            |                                   |
| <b>Racial/ethnic discrimination</b>                   | 262 (3.1%)       | 210 (10.4%)  | 200.205                    | <0.001                            | 359 (4.4%)          | 111 (5.5%)      | 4.782                      | 0.068                             |
| <b>Discrimination towards non-US born individuals</b> | 120 (1.4%)       | 57 (2.6%)    | 17.215                     | <0.001                            | 93 (1.1%)           | 83 (3.9%)       | 85.062                     | <0.001                            |
| <b>Sexual orientation-based discrimination</b>        | 286 (3.4%)       | 122 (5.8%)   | 26.686                     | <0.001                            | 330 (4%)            | 75 (3.7%)       | 0.358                      | 0.55                              |
| <b>Weight-based discrimination</b>                    | 443 (5.1%)       | 211 (9.8%)   | 65.693                     | <0.001                            | 489 (5.7%)          | 161 (7.6%)      | 10.507                     | 0.004                             |
| <b>Lifetime history of suicidal behaviors, n (%)</b>  |                  |              |                            |                                   |                     |                 |                            |                                   |
| <b>Lifetime suicidal ideation</b>                     | 683 (7.7%)       | 214 (9.6%)   | 8.166                      | 0.004                             | 718 (8.2%)          | 169 (7.7%)      | 0.604                      | 0.548                             |
| <b>Lifetime suicide attempt</b>                       | 96 (1.1%)        | 44 (2%)      | 11.124                     | 0.001                             | 114 (1.3%)          | 24 (1.1%)       | 0.618                      | 0.548                             |
| <b>Lifetime suicidality</b>                           | 688 (7.8%)       | 216 (9.7%)   | 8.399                      | 0.004                             | 723 (8.3%)          | 171 (7.8%)      | 0.522                      | 0.548                             |

Note: Black versus non-Black and Hispanic versus non-Hispanic comparisons are made between experiences of discrimination and prevalence of suicidality.

<sup>a</sup> *p*-values were FDR corrected for multiple comparisons.

**Table S4.** Stratified analysis of main model for Asian, American Indian, and Native Hawaiian youths

|                                                                      | Asian |            |         | American Indian |                 |                 | Native Hawaiian |                 |                 |
|----------------------------------------------------------------------|-------|------------|---------|-----------------|-----------------|-----------------|-----------------|-----------------|-----------------|
|                                                                      | n=723 |            |         | n=386           |                 |                 | n=70            |                 |                 |
|                                                                      | OR    | 95%CI      | p-value | OR              | 95%CI           | p-value         | OR              | 95%CI           | p-value         |
| <b>High racial/ethnic discrimination</b>                             | 1.71  | 0.58-5.08  | 0.334   | 1.87            | 0.68-5.12       | 0.226           | NA <sup>#</sup> | NA <sup>#</sup> | NA <sup>#</sup> |
| <b>Past 12 months discrimination towards non-US born individuals</b> | 0.32  | 0.04-2.87  | 0.31    | NA <sup>#</sup> |
| <b>Past 12 months sexual orientation-based discrimination</b>        | 5.8   | 1.62-20.84 | 0.007   | 7.46            | 2.36-23.56      | 0.001           | NA <sup>#</sup> | NA <sup>#</sup> | NA <sup>#</sup> |
| <b>Past 12 months weight-based discrimination</b>                    | 2.74  | 0.6-12.53  | 0.194   | 2.98            | 0.73-12.25      | 0.13            | NA <sup>#</sup> | NA <sup>#</sup> | NA <sup>#</sup> |

Note: Binary logistic regression model with racial/ethnic discrimination as independent variable and suicidality as dependent variable, co-varying for age, sex, race (Black, White), Hispanic ethnicity, parental education and the other discrimination types and their associated identities (non-US born, identifying as LGBT, being obese). Model was run separately on Asian, American Indian, and Native Hawaiian youths. Note that Native Hawaiian sample was underpowered to handle the number of variables used to test the study’s questions in a stratified analysis.

Abbreviations: CI = confidence interval; LGBT = lesbian, gay, bisexual, transgender; OR = odds ratio.

<sup>#</sup>OR could not be calculated due to few cases in relevant cells.

**Table S5.** Sensitivity analysis using continuous (mean) score on the racial/ethnic discrimination scale

|                                                                      | Basic model |           |         | Main model (includes other Discriminations) |           |         |
|----------------------------------------------------------------------|-------------|-----------|---------|---------------------------------------------|-----------|---------|
|                                                                      | Model 1     |           |         | Model 2                                     |           |         |
|                                                                      | OR          | 95%CI     | p-value | OR                                          | 95%CI     | p-value |
| <b>High racial/ethnic discrimination</b>                             | 2.76        | 2.42-3.14 | <0.001  | 2.41                                        | 2.04-2.85 | <0.001  |
| <b>Past 12 months discrimination towards non-US born individuals</b> |             |           |         | 0.65                                        | 0.36-1.19 | 0.163   |
| <b>Past 12 months sexual orientation-based discrimination</b>        |             |           |         | 2.94                                        | 2.21-3.91 | <0.001  |
| <b>Past 12 months weight-based discrimination</b>                    |             |           |         | 2.52                                        | 1.94-3.27 | <0.001  |

Note: Binary logistic regression models were run using a continuous measure of the mean value from the 7-question racial/ethnic discrimination Likert scale as the independent variable and suicidality as the dependent variable.

Model 1 co-varies for age, sex, race (Black, White, and non-Black minority racial groups), Hispanic ethnicity, and parental education.

Model 2 (referred to as “Main model” in the manuscript) builds on Model 1 by adding the other 3 types of discrimination, and their associated identities (non-US born, identifying as LGBT, being obese).

Abbreviations: CI = confidence interval; LGBT = lesbian, gay, bisexual, transgender; OR = odds ratio.

**Table S6.** Sensitivity analysis using yes/no past 12-months racial/ethnic/color discrimination variable instead of High/Low (stratified at 90th percentile) as in main text.

|                                                                      | Basic model |          |         | Main model (includes other Discriminations) |           |         |
|----------------------------------------------------------------------|-------------|----------|---------|---------------------------------------------|-----------|---------|
|                                                                      | Model 1     |          |         | Model 2                                     |           |         |
|                                                                      | OR          | 95%CI    | p-value | OR                                          | 95%CI     | p-value |
| <b>Past 12 months racial/ethnic/color discrimination</b>             | 2.79        | 2.16-3.6 | <0.001  | 1.41                                        | 0.99-1.99 | 0.053   |
| <b>Past 12 months discrimination towards non-US born individuals</b> |             |          |         | 0.72                                        | 0.36-1.44 | 0.354   |
| <b>Past 12 months sexual orientation-based discrimination</b>        |             |          |         | 3.84                                        | 2.86-5.17 | <0.001  |
| <b>Past 12 months weight-based discrimination</b>                    |             |          |         | 3.01                                        | 2.29-3.95 | <0.001  |

Note: Binary logistic regression models were run using binary yes/no question regarding experiencing racial/ethnic discrimination in the past 12 months as the independent variable and suicidality as the dependent variable.

Model 1 co-varies for age, sex, race (Black, White, and non-Black minority racial groups), Hispanic ethnicity, and parental education.

Model 2 (referred to as “Main model” in the manuscript) builds on Model 1 by adding the other 3 types of discrimination, and their associated identities (non-US born, identifying as LGBT, being obese).

Abbreviations: CI = confidence interval; LGBT = lesbian, gay, bisexual, transgender; OR = odds ratio.

**Table S7.** Sensitivity analyses using one child from each family to account for family effects

|                 |                                                               | Basic model |           |         | Main model (includes other Discriminations) |           |         | Exposome model |           |         | Psychopathology model |           |         |
|-----------------|---------------------------------------------------------------|-------------|-----------|---------|---------------------------------------------|-----------|---------|----------------|-----------|---------|-----------------------|-----------|---------|
|                 |                                                               | Model 1     |           |         | Model 2                                     |           |         | Model 3        |           |         | Model 4               |           |         |
|                 |                                                               | OR          | 95%CI     | p-value | OR                                          | 95%CI     | p-value | OR             | 95%CI     | p-value | OR                    | 95%CI     | p-value |
| Discrimination  | High race/ethnic discrimination                               | 3.68        | 3.05-4.45 | <0.001  | 2.79                                        | 2.22-3.52 | <0.001  | 1.89           | 1.16-3.07 | 0.01    | 1.64                  | 1.27-2.21 | <0.001  |
|                 | Past 12 months discrimination towards non-US born individuals |             |           |         | 0.93                                        | 0.51-1.7  | 0.808   | 0.99           | 0.31-3.14 | 0.98    | 0.75                  | 0.39-1.42 | 0.369   |
|                 | Past 12 months sexual orientation-based discrimination        |             |           |         | 2.97                                        | 2.18-4.05 | <0.001  | 2.94           | 1.57-5.50 | 0.001   | 2.01                  | 1.43-2.82 | <0.001  |
|                 | Past 12 months weight-based discrimination                    |             |           |         | 2.22                                        | 1.66-2.98 | <0.001  | 1.17           | 0.62-2.22 | 0.623   | 1.61                  | 1.17-2.21 | 0.003   |
| Exposome        | Poverty experiences                                           |             |           |         |                                             |           |         | 1.15           | 1-1.32    | 0.046   |                       |           |         |
|                 | Family conflict                                               |             |           |         |                                             |           |         | 1.15           | 1.06-1.26 | 0.001   |                       |           |         |
|                 | Negative life events                                          |             |           |         |                                             |           |         | 1.17           | 1.09-1.24 | <0.001  |                       |           |         |
|                 | Neighborhood SES scale                                        |             |           |         |                                             |           |         | 0.99           | 0.99-1.00 | 0.063   |                       |           |         |
| Psychopathology | Psychosis scale                                               |             |           |         |                                             |           |         |                |           |         | 1.06                  | 1.05-1.07 | <0.001  |
|                 | Any externalizing Dx                                          |             |           |         |                                             |           |         |                |           |         | 1.39                  | 1.15-1.68 | 0.001   |
|                 | Depression Dx                                                 |             |           |         |                                             |           |         |                |           |         | 1.81                  | 1.32-2.50 | <0.001  |
|                 | Anxiety Dx                                                    |             |           |         |                                             |           |         |                |           |         | 1.90                  | 1.31-2.76 | 0.001   |

Note: Models 1-4 were run again using data from only one child in each family to account for family-relatedness effects. Sample sized decreased to 9,294 participants (High discrimination n = 1,206; Low discrimination n = 7,965).

Model 1 covaries for age, sex, race (Black, White, and non-Black minority racial groups), Hispanic ethnicity, and parental education.

Model 2 builds on Model 1 by adding the other 3 types of discrimination, and their associated identities (non-US born, identifying as LGBT, being obese).



Model 3 builds on Model 2 by adding exposure adversities including poverty, neighborhood SES, family conflict, and negative life events. Model 4 builds on Model 2 but covaries for psychopathology (prodromal psychosis scale, any externalizing Dx, depression Dx, and anxiety Dx). Abbreviations: CI = confidence interval; Dx = diagnosis; LGBT = lesbian, gay, bisexual, transgender; OR = odds ratio; SES = socioeconomic status.

**Table S8.** Sensitivity analyses excluding families with multiple children to account for family effects.

|                 |                                                               | Basic model |           |         | Main model (includes other Discriminations) |           |         | Exposome model |           |         | Psychopathology model |           |         |
|-----------------|---------------------------------------------------------------|-------------|-----------|---------|---------------------------------------------|-----------|---------|----------------|-----------|---------|-----------------------|-----------|---------|
|                 |                                                               | Model 1     |           |         | Model 2                                     |           |         | Model 3        |           |         | Model 4               |           |         |
|                 |                                                               | OR          | 95%CI     | p-value | OR                                          | 95%CI     | p-value | OR             | 95%CI     | p-value | OR                    | 95%CI     | p-value |
| Discrimination  | High race/ethnic discrimination                               | 3.65        | 2.96-4.49 | <0.001  | 2.84                                        | 2.20-3.67 | <0.001  | 1.87           | 1.42-2.46 | <0.001  | 1.65                  | 1.24-2.18 | 0.001   |
|                 | Past 12 months discrimination towards non-US born individuals |             |           |         | 0.89                                        | 0.45-1.74 | 0.724   | 0.97           | 0.48-1.95 | 0.933   | 0.71                  | 0.35-1.46 | 0.354   |
|                 | Past 12 months sexual orientation-based discrimination        |             |           |         | 3.36                                        | 2.41-4.68 | <0.001  | 2.78           | 1.96-3.96 | <0.001  | 2.33                  | 1.62-3.35 | <0.001  |
|                 | Past 12 months weight-based discrimination                    |             |           |         | 2.19                                        | 1.58-3.03 | <0.001  | 1.60           | 1.13-2.26 | 0.008   | 1.51                  | 1.06-2.16 | 0.023   |
| Exposome        | Poverty experiences                                           |             |           |         |                                             |           |         | 1.07           | 0.98-1.16 | 0.154   |                       |           |         |
|                 | Family conflict                                               |             |           |         |                                             |           |         | 1.23           | 1.17-1.30 | <0.001  |                       |           |         |
|                 | Negative life events                                          |             |           |         |                                             |           |         | 1.20           | 1.15-1.25 | <0.001  |                       |           |         |
|                 | Neighborhood SES scale                                        |             |           |         |                                             |           |         | 1.00           | 0.99-1.00 | 0.661   |                       |           |         |
| Psychopathology | Psychosis scale                                               |             |           |         |                                             |           |         |                |           |         | 1.06                  | 1.05-1.07 | <0.001  |
|                 | Any externalizing Dx                                          |             |           |         |                                             |           |         |                |           |         | 1.33                  | 1.08-1.64 | 0.008   |
|                 | Depression Dx                                                 |             |           |         |                                             |           |         |                |           |         | 1.83                  | 1.29-2.60 | 0.001   |
|                 | Anxiety Dx                                                    |             |           |         |                                             |           |         |                |           |         | 1.93                  | 1.27-2.94 | 0.002   |

Note: Models 1-4 were run again using data excluding families with multiple children to account for family-relatedness effects. Sample sized decreased to 7,167 participants (High discrimination n = 831; Low discrimination n = 6,336).

Model 1 covaries for age, sex, race (Black, White, and non-Black minority racial groups), Hispanic ethnicity, and parental education.

Model 2 builds on Model 1 by adding the other 3 types of discrimination, and their associated identities (non-US born, identifying as LGBT, being obese).

Model 3 builds on Model 2 by adding exposure adversities including poverty, neighborhood SES, family conflict, and negative life events. Model 4 builds on Model 2 but covaries for psychopathology (prodromal psychosis scale, any externalizing Dx, depression Dx, and anxiety Dx). Abbreviations: CI = confidence interval; Dx = diagnosis; LGBT = lesbian, gay, bisexual, transgender; OR = odds ratio; SES = socioeconomic status.

**Table S9.** Sensitivity analyses estimating multilevel logistic regression to account for family relatedness.

|                 |                                                               | Basic model |      |         | Main model<br>(includes other Discriminations) |      |         | Exposome model |       |         | Psychopathology model |      |         | Full model |       |         |
|-----------------|---------------------------------------------------------------|-------------|------|---------|------------------------------------------------|------|---------|----------------|-------|---------|-----------------------|------|---------|------------|-------|---------|
|                 |                                                               | Model 1     |      |         | Model 2                                        |      |         | Model 3        |       |         | Model 4               |      |         | Model 5    |       |         |
|                 |                                                               | OR          | SE   | p-value | OR                                             | SE   | p-value | OR             | SE    | p-value | OR                    | SE   | p-value | OR         | SE    | p-value |
| Discrimination  | High racial/ethnic discrimination                             | 3.50        | 0.31 | <0.001  | 2.60                                           | 0.29 | <0.001  | 1.80           | 0.22  | <0.001  | 1.55                  | 0.20 | 0.005   | 1.24       | 0.16  | 0.144   |
|                 | Past 12 months discrimination towards non-US born individuals |             |      |         | 0.77                                           | 0.24 | 0.334   | 0.85           | 0.28  | 0.602   | 0.63                  | 0.21 | 0.075   | 0.78       | 0.27  | 0.403   |
|                 | Past 12 months sexual orientation-based discrimination        |             |      |         | 3.10                                           | 0.47 | <0.001  | 2.63           | 0.41  | <0.001  | 2.10                  | 0.35 | 0.002   | 2.01       | 0.34  | 0.003   |
|                 | Past 12 months weight-based discrimination                    |             |      |         | 2.57                                           | 0.36 | <0.001  | 1.93           | 0.29  | 0.001   | 1.87                  | 0.29 | 0.003   | 1.57       | 0.26  | 0.027   |
| Exposome        | Family poverty experiences                                    |             |      |         |                                                |      |         | 1.07           | 0.04  | 0.075   |                       |      |         | 1.08       | 0.04  | 0.052   |
|                 | Family conflict scale                                         |             |      |         |                                                |      |         | 1.21           | 0.03  | <0.001  |                       |      |         | 1.17       | 0.03  | <0.001  |
|                 | Negative life events count                                    |             |      |         |                                                |      |         | 1.18           | 0.02  | <0.001  |                       |      |         | 1.12       | 0.02  | <0.001  |
|                 | Neighborhood SES scale                                        |             |      |         |                                                |      |         | 1.00           | <0.01 | 0.341   |                       |      |         | 1.00       | <0.01 | 0.082   |
| Psychopathology | Psychosis scale                                               |             |      |         |                                                |      |         |                |       |         | 1.06                  | 0.01 | <0.001  | 1.05       | 0.01  | <0.001  |
|                 | Any externalizing Dx                                          |             |      |         |                                                |      |         |                |       |         | 1.49                  | 0.14 | <0.001  | 1.30       | 0.12  | 0.013   |
|                 | Depression Dx                                                 |             |      |         |                                                |      |         |                |       |         | 1.75                  | 0.28 | 0.007   | 1.72       | 0.28  | 0.010   |
|                 | Anxiety Dx                                                    |             |      |         |                                                |      |         |                |       |         | 1.74                  | 0.35 | 0.032   | 1.77       | 0.36  | 0.031   |

Note: Five multilevel logistic regression models were estimated to disentangle the role of family relatedness in the association between racial/ethnic discrimination (independent variable) and suicidality (dependent variable).

Model 1 co-varies for age, sex, race (Black, White, non-Black minority racial groups), Hispanic ethnicity, and parental education.

Model 2 (referred to as “Main model” in the manuscript) builds on Model 1 by adding the other 3 types of discrimination, and their associated identities (non-US born, identifying as LGBT, being obese/underweight).

Model 3 builds on Model 2 by adding exposome adversities including poverty, neighborhood SES, family conflict, and negative life events.

Model 4 builds on Model 2 but covaries for psychopathology (prodromal psychosis scale, any externalizing Dx, depression Dx, and anxiety Dx).

Model 5 combines Models 3 and 4 by covarying for both exposome adversity and psychopathology.

Abbreviations: Dx = diagnosis; LGBT = lesbian, gay, bisexual, transgender; OR = odds ratio; SE = standard error; SES = socioeconomic status.

**Table S10.** Characteristics of matched samples.

|                                                         | Matched analysis 1                       |        |                                           |        |         |                   | Matched analysis 2 |        |                 |        |         |                   |
|---------------------------------------------------------|------------------------------------------|--------|-------------------------------------------|--------|---------|-------------------|--------------------|--------|-----------------|--------|---------|-------------------|
|                                                         | Low racial/ethnic discrimination (n=954) |        | High racial/ethnic discrimination (n=954) |        | p-value | Corrected p-value | White (n=1,399)    |        | Black (n=1,399) |        | p-value | Corrected p-value |
|                                                         | Mean                                     | SD     | Mean                                      | SD     |         |                   | Mean               | SD     | Mean            | SD     |         |                   |
| Age, years                                              | 10.89                                    | 0.63   | 10.91                                     | 0.63   | 0.529   | 0.684             | 10.94              | 0.62   | 10.92           | 0.63   | 0.651   | 0.936             |
| Parental education, years                               | 15.28                                    | 2.96   | 15.61                                     | 2.72   | 0.013   | 0.108             | 15.16              | 2.75   | 15.23           | 2.31   | 0.515   | 0.936             |
|                                                         | n                                        | %      | n                                         | %      | p-value | Corrected p-value | n                  | %      | n               | %      | p-value | Corrected p-value |
| Sex, male                                               | 598                                      | 62.70% | 350                                       | 36.70% | 0.776   | 0.776             | 723                | 51.70% | 708             | 50.60% | 0.571   | 0.936             |
| White                                                   | 504                                      | 52.80% | 540                                       | 56.60% | 0.098   | 0.235             | 1,399              | 0%     | 0               | 100%   | N/A     | N/A               |
| Black                                                   | 403                                      | 42.20% | 366                                       | 38.40% | 0.084   | 0.235             | 0                  | 100%   | 1,399           | 0%     | N/A     | N/A               |
| Hispanic                                                | 237                                      | 24.80% | 243                                       | 25.50% | 0.752   | 0.776             | 171                | 12.20% | 95              | 6.80%  | <0.001  | <0.001            |
| High racial/ethnic discrimination                       | 0                                        | 0%     | 954                                       | 100%   | N/A     |                   | 271                | 19.40% | 309             | 22.10% | 0.076   | 0.418             |
| Reported discrimination towards non-US born individuals | 53                                       | 5.60%  | 71                                        | 7.40%  | 0.095   | 0.235             | 28                 | 2%     | 36              | 2.60%  | 0.312   | 0.936             |
| Reported sexual orientation-based discrimination        | 111                                      | 11.60% | 131                                       | 13.70% | 0.169   | 0.338             | 76                 | 5.40%  | 81              | 5.80%  | 0.681   | 0.936             |
| Reported weight-based discrimination                    | 146                                      | 15.30% | 158                                       | 16.60% | 0.453   | 0.68              | 103                | 7.40%  | 112             | 8%     | 0.523   | 0.936             |
| Non-US born                                             | 24                                       | 2.50%  | 43                                        | 4.50%  | 0.018   | 0.108             | 28                 | 2%     | 29              | 2.10%  | 0.894   | 0.983             |
| LGBT                                                    | 13                                       | 1.40%  | 18                                        | 1.90%  | 0.365   | 0.623             | 18                 | 1.30%  | 18              | 1.30%  | 1       | 1                 |

---

|       |     |     |     |        |      |       |  |     |        |     |        |       |       |
|-------|-----|-----|-----|--------|------|-------|--|-----|--------|-----|--------|-------|-------|
| Obese | 200 | 21% | 190 | 19.90% | 0.57 | 0.684 |  | 375 | 26.80% | 382 | 27.30% | 0.766 | 0.936 |
|-------|-----|-----|-----|--------|------|-------|--|-----|--------|-----|--------|-------|-------|

---

Note: Corrected  $p$ -values are FDR corrected.

Abbreviations: LGBT = lesbian, gay, bisexual, transgender; N/A = not available; SD = standard deviation.

**Figure S1.** Distribution of participants across deciles of self-reported racial/ethnic discrimination

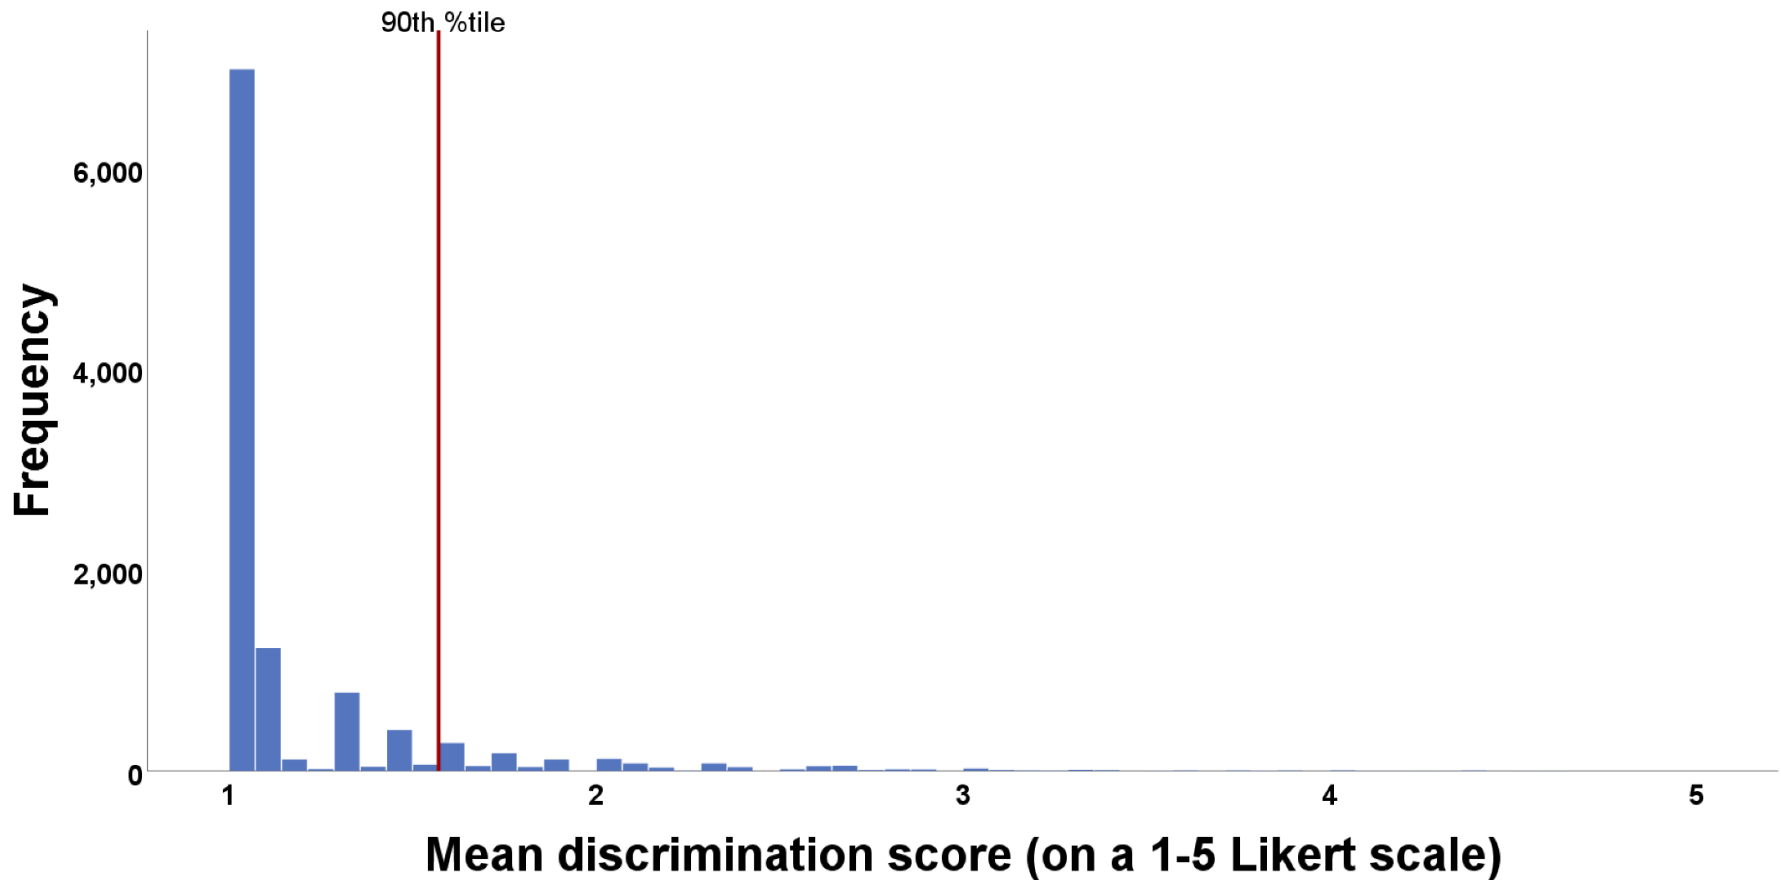

Note: Histogram describing distribution of mean score in the seven items included in the racial/ethnic discrimination scale. Red line represents the 90<sup>th</sup> percentile cutoff used to determine High racial/ethnic discrimination in the current analysis.



**Figure S2.** Scree plot of family poverty experiences

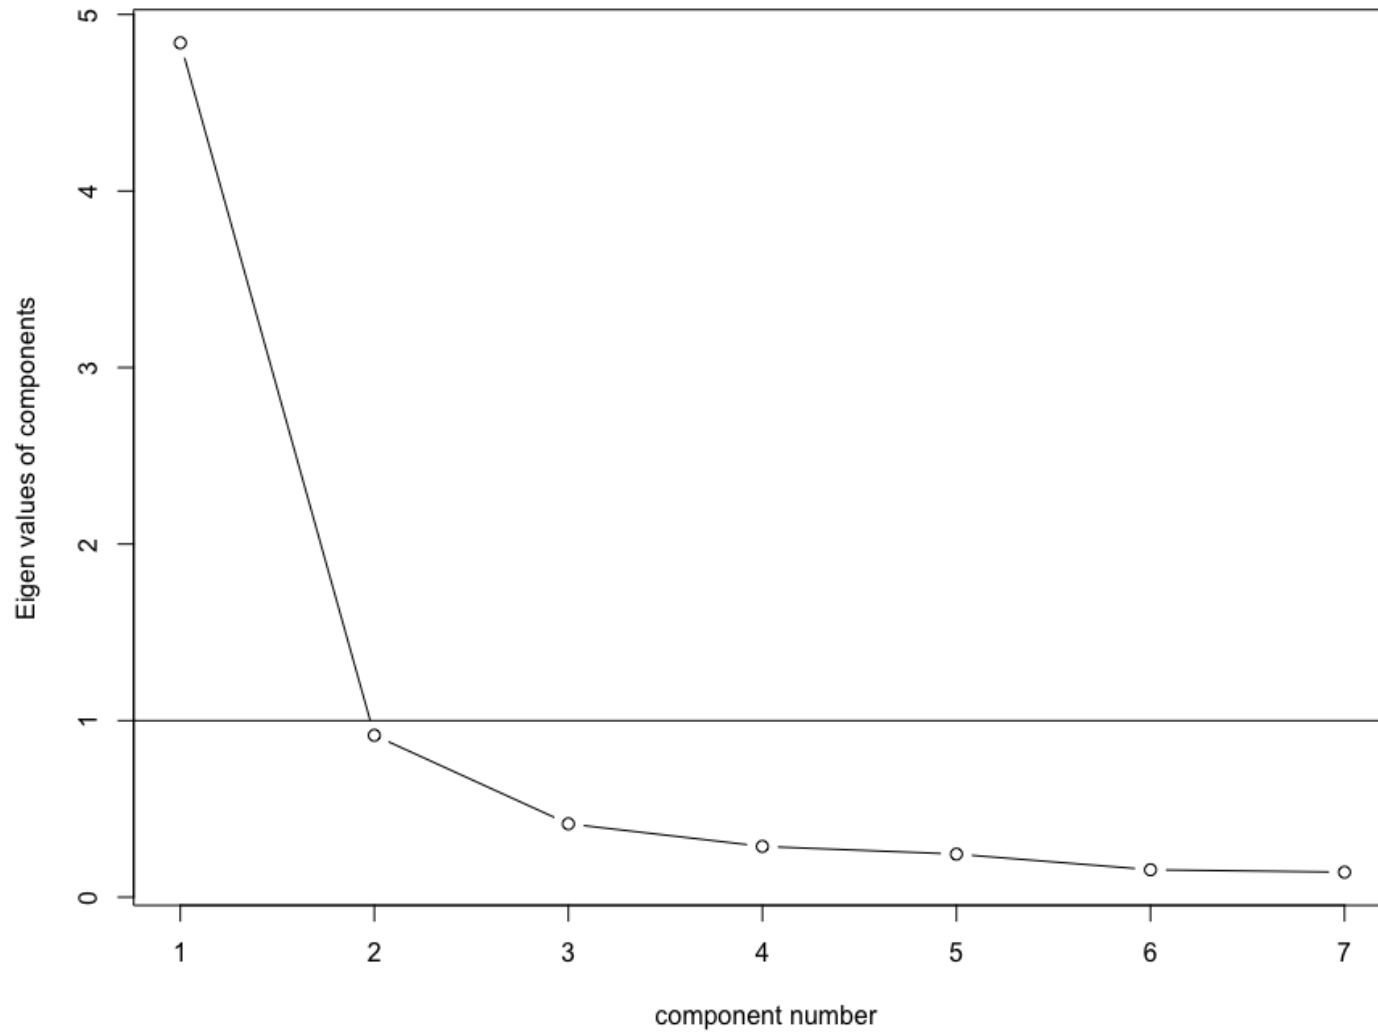

Note: Eigen values for all components subsequent to the first demonstrate the ability to collapse the 7-item family poverty instrument into one scale summarizing total poverty experiences.

**Figure S3.** Correlation matrix between discrimination, exposome, and psychopathology measures.

|                      | Discrimination scale | Household poverty | Family conflict | Bad life events | Neighbourhood SES | Prodromal scale | Externalizing Dx | Depression Dx | Anxiety Dx |
|----------------------|----------------------|-------------------|-----------------|-----------------|-------------------|-----------------|------------------|---------------|------------|
| Discrimination scale | 1.000                | 0.159             | 0.271           | 0.255           | 0.133             | 0.365           | 0.130            | 0.215         | 0.152      |
| Household poverty    | 0.159                | 1.000             | 0.113           | 0.154           | 0.202             | 0.160           | 0.131            | 0.101         | 0.084      |
| Family conflict      | 0.271                | 0.113             | 1.000           | 0.192           | 0.088             | 0.280           | 0.166            | 0.191         | 0.115      |
| Bad life events      | 0.255                | 0.154             | 0.192           | 1.000           | 0.113             | 0.390           | 0.148            | 0.166         | 0.143      |
| Neighbourhood SES    | 0.133                | 0.202             | 0.088           | 0.113           | 1.000             | 0.137           | 0.044            | 0.166         | 0.063      |
| Prodromal scale      | 0.365                | 0.160             | 0.280           | 0.390           | 0.137             | 1.000           | 0.174            | 0.244         | 0.283      |
| Externalizing Dx     | 0.130                | 0.131             | 0.166           | 0.148           | 0.044             | 0.174           | 1.000            | 0.138         | 0.124      |
| Depression Dx        | 0.215                | 0.101             | 0.191           | 0.166           | 0.166             | 0.244           | 0.138            | 1.000         | 0.480      |
| Anxiety Dx           | 0.152                | 0.084             | 0.115           | 0.143           | 0.063             | 0.283           | 0.124            | 0.480         | 1.000      |

Note: A mixed correlation matrix shows biserial correlations between various exposures of the study including the discrimination scale, the environmental adversities, and the psychopathology measures, which were all positively correlated. All correlations are highly significant ( $p < 0.001$ ).

Abbreviations: Dx = diagnosis; SES = socioeconomic status.
